# Supplementary material
Source: PubMed Central journal article supplement (PMC6926021)
Supplement: pnas.1908137116.sapp.pdf [file pnas.1908137116.sapp.pdf]

Supplementary Information for

## **Targeting liver aldehyde dehydrogenase-2 prevents heavy but not moderate alcohol drinking**

**Adrien Guillot<sup>a</sup>, Tianyi Ren<sup>a</sup>, Tony Jourdan<sup>b</sup>, Robert J Pawlosky<sup>c</sup>, Elaine Han<sup>a</sup>,  
Seung-Jin Kim<sup>a</sup>, Li Zhang<sup>d</sup>, George F. Koob<sup>e</sup>, Bin Gao<sup>a\*</sup>**

<sup>a</sup> Laboratory of Liver Diseases, National Institute on Alcohol Abuse and Alcoholism, National Institutes of Health, Bethesda, MD, 20892, USA

<sup>b</sup> Laboratory of Physiologic Studies, National Institute on Alcohol Abuse and Alcoholism, National Institutes of Health, Bethesda, MD, 20892, USA

<sup>c</sup> Laboratory of Metabolic Control, National Institute on Alcohol Abuse and Alcoholism, National Institutes of Health, Bethesda, MD, 20892, USA

<sup>d</sup> Laboratory for Integrative Neuroscience, National Institute on Alcohol Abuse and Alcoholism, National Institutes of Health, Bethesda, MD, 20892, USA

<sup>e</sup> National Institute on Drug Abuse, National Institutes of Health, Baltimore, MD, 21224, USA

**\*Corresponding author:** Bin Gao, M.D., Ph.D., NIAAA/NIH, Bethesda, 20892. USA.

Email: [bgao@mail.nih.gov](mailto:bgao@mail.nih.gov)

**This PDF file includes:**

Supplementary methods  
SI References  
Supporting Table 1  
Figures S1 to S9

## SUPPLEMENTARY METHODS

**Assessment of tissue-specific *Aldh2* deletion.** Tissue-specific *Aldh2* deletion was confirmed at the protein levels by Western blot. Briefly, total protein concentration was evaluated by using a BCA Protein Assay kit (Pierce, Carlsbad, CA), and 30  $\mu\text{g}$  total proteins were loaded per well in a 4-12% Bis-Tris gel (Bio-Rad, Hercules, CA). ALDH2 protein was detected using an anti-ALDH2 antibody (Abcam, Cambridge, MA). Antibodies raised against  $\beta$ -actin (Abcam Cambridge, MA) and GAPDH (Cell Signaling, Danvers, MA) were used as protein loading controls.

**Serum sample extraction procedure and gas chromatograph-mass spectrometer (GC-MS) analysis.** Mice were deeply anesthetized one-hour or three-hours after 5 g/kg ethanol gavage by a lethal dose of intraperitoneal pentobarbital injection. Blood was collected by traumatic avulsion of the orbital globe and kept for 10 minutes at room temperature in tubes containing a serum gel with clotting activator (Sarstedt, Newton, NC). Blood samples were then centrifuged at 4,000 g for 10 minutes at 4°C. Fifty microliters ( $\mu\text{L}$ ) of fresh mouse sera (on ice) was added to 15  $\mu\text{L}$  of an extraction solution (1.2% Triton X-100 in 1.8 g/L acetonitrile in  $\text{H}_2\text{O}$ ) as described by Pontes and colleagues (1) to which was added 15  $\mu\text{L}$  of labeled internal standards (ethanol-d<sub>2</sub>, 537.5 mM, acetaldehyde-d<sub>4</sub> solution 803  $\mu\text{M}$  from Cambridge Isotope Labs [Andover, MA]). Samples were vortexed for one min and filtered through conical 0.5 mL Amicon microcon 30-micron YM-3 filter devices (Millipore, Bedford MA) using an Eppendorf 5417R centrifuge equipped with a F45-30-11 rotor at 12,000 rpm at 4°C for 12 min. Finally, 1.2  $\mu\text{L}$  of solution was taken for analysis on an Agilent 5973 gas chromatograph-mass spectrometer in the electron impact mode. Samples were injected using the splitless procedure with a 0.2 min delay. The injection port was maintained at 50°C and the oven temperature was programmed from 45-120 °C at 8 °C/min. Analysis was carried out in the electron impact mode with a 70-eV ionization energy. The acetaldehyde eluted at 2.6 min and was quantified using the ratio of the d<sub>4</sub>-molecular ion ( $m/z$  48) to that non-labeled acetaldehyde ( $m/z$  44). Ethanol eluted at 5.2 min and the endogenous compound were quantified using the ratio of the d<sub>2</sub>-fragment ion ( $m/z$  48) of the labeled ethanol to that non-labeled compound ( $m/z$  46).

**Drinking in the dark (DID).** Mice were individually housed for a week before starting the experiment (acclimation period) and given free access to a water-containing bottle during

daylight. Three hours after lights were turned off in the animal holding room, the water bottle was replaced by an ethanol-containing bottle (20% vol/vol) for two hours (days 1-3) or for four hours (day 4). Ethanol intake was measured at the end of each period. Bottle replacement was performed while a red-lamp was temporarily turned on to prevent disruption of the mice' circadian rhythm.

**Chronic binge model.** The E10d + 1B feeding model was described previously (Bertola et al., Nat Protoc. 2013 Mar; 8(3): 627–637). Briefly, mice were initially fed a control Lieber-DeCarli liquid diet (catalog F1259SP, Bio-Serv, Flemington, NJ) *ad libitum* for 5 days during acclimatization. Subsequently, mice were allowed free access to an ethanol diet (catalog F1258SP, Bio-Serv) containing 5% (v/v) ethanol for 10 days. On day 11, they received a single dose of ethanol (5 g/kg body weight) via oral gavage and were killed 9 hours later.

**Biochemical assays.** Serum alanine aminotransferase (ALT), and aspartate aminotransferase (AST) activities were determined using a Catalyst Dx Chemistry Analyzer (IDEXX Laboratories, Westbrook, ME).

**Serum cytokine levels.** Cytometric bead array (CBA) test was performed using LEGENDplex bead-based immunoassays (BioLegend, San Diego, CA), following manufacturer's instructions.

**Blood cell count.** The anticoagulated blood was collected from mice. Cell count test was performed with an Hemavet 950 FS Hematology Analyzer (Drew Scientific, Dallas, TX).

**Tissue staining.** Tissue samples were collected and fixed in 10% formalin and paraffin-embedded following standard procedure. Embedded liver tissues were cut to 4  $\mu$ m thickness and subjected to staining with hematoxylin and eosin (H&E), or subjected to immunohistochemical staining for GFP, F4/80 or myeloperoxidase (MPO). Rabbit anti-GFP (Cell Signaling), anti-F4/80 (Bio-Rad, Hercules, CA) and anti-MPO polyclonal antibody (Biocare Medical, LLC, Concord, CA), and a rabbit ABC staining kit (Vector Laboratories, Inc., Burlingame, CA) were used according to the manufacturer's instruction.

**Quantitative RT-PCR.** Total RNA was extracted from snap-frozen liver tissue or cell lysates using the RNeasy Mini Kit (Qiagen, Germantown, MD), following manufacturer's instructions. High-Capacity cDNA Reverse Transcription Kit (ThermoFisher Scientific, Carlsbad, CA) was used for reverse transcription. Real-time PCR was performed on a QuantStudio 6 Flex Real-Time PCR System (ThermoFisher Scientific, Carlsbad, CA), using BrightGreen 2X qPCR MasterMix-ROX (Applied Biological Materials Inc., Richmond, BC). Oligonucleotides used for PCR amplification are listed in Supporting Table 1.

#### **SUPPLEMENTARY REFERENCE**

1. Pontes H, *et al.* (2009) GC determination of acetone, acetaldehyde, ethanol, and methanol in biological matrices and cell culture. *J Chromatogr Sci* 47(4):272-278.

**Supporting Table 1. Primer sequences for RT-PCR**

| <b>Gene</b>  | <b>Forward primer (5' to 3')</b> | <b>Reverse primer (5' to 3')</b> |
|--------------|----------------------------------|----------------------------------|
| <i>Ccl2</i>  | TCTGGACCCATTCCTTCTTGG            | TCAGCCAGATGCAGTTAACGC            |
| <i>Cd68</i>  | CCATCCTTCACGATGACACCT            | GGCAGGGTTATGAGTGACAGTT           |
| <i>Cxcl1</i> | TCTCCGTTACTTGGGGAC               | CCACACTCAAGAATGGTCGC             |
| <i>Cxcl2</i> | TCCAGGTCAGTTAGCCTTGC             | CGGTCAAAAAGTTTGCCTTG             |
| <i>F4/80</i> | CTTTGGCTATGGGCTTCCAGTC           | GCAAGGAGGACAGAGTTTATCGTG         |
| <i>Ifng</i>  | TAGCCAAGACTGTGATTGCGG            | AGACATCTCCTCCCATCAGCAG           |
| <i>Il6</i>   | TCCATCCAGTTGCCTTCTTG             | TTCCACGATTTCCAGAGAAC             |
| <i>Ly6g</i>  | TGCGTTGCTCTGGAGATAGA             | CAGAGTAGTGGGGCAGATGG             |
| <i>Tnfa</i>  | AGGCTGCCCCGACTACGT               | GACTTTCTCCTGGTATGAGATAGCAA       |
| <i>18s</i>   | ACGGAAGGGCACCACCAGGA             | CACCACCACCCACGGAATCG             |

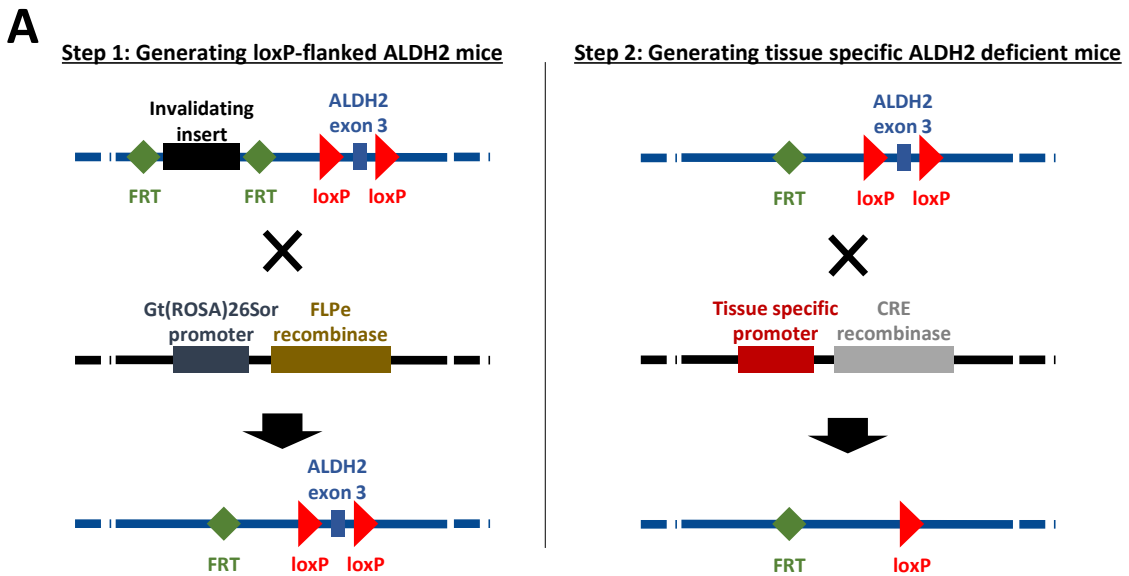

**B**

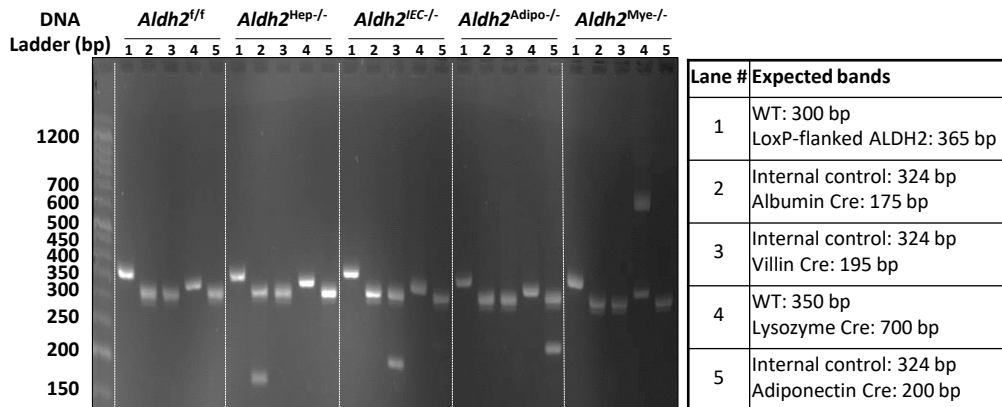

### Figure S1: Generation of tissue-specific ALDH2 knock-out mice

The *Aldh2* gene was disrupted by inserting SA-beta gal-Neo that was flanked by FRT sequence (*Aldh2<sup>tm1a(EUCOMM)Wtsi</sup>* mice [kindly provided by Dr. Patel]). This *Aldh2* gene was also flanked with two loxP sites outside of exon 3. (A) To generate conditional *Aldh2<sup>-/-</sup>* mice, we first activated *Aldh2* gene in *Aldh2<sup>-/-</sup>* mice by crossing *Aldh2<sup>-/-</sup>* mice with FLPe recombinase expressing mice to remove the FRT-flanked invalidating insert from the *Aldh2* gene. This led to the generation of mice having a functional *Aldh2* gene with its exon 3 flanked by two loxP sequences. In a second step, exon3-floxed mice were bred with homozygous *Aldh2*-floxed and heterozygous tissue-specific Cre-expressing mice, to obtain *Cre<sup>+</sup>Aldh2<sup>f/f</sup>* mice, thus generating tissue-specific *Aldh2*-deficient mice and littermate controls (*Aldh2<sup>f/f</sup>*). By using this breeding method, we generated liver (*Aldh2<sup>Hep-/-</sup>*), intestinal epithelial cell (*Aldh2<sup>IEC-/-</sup>*), adipose tissue (*Aldh2<sup>Adipo-/-</sup>*), myeloid cell (*Aldh2<sup>Mye-/-</sup>*), glial cell (*Aldh2<sup>Gfap-/-</sup>*), and neuron (*Aldh2<sup>Camk2a-/-</sup>*) specific *Aldh2*-deficient mice. (B) Mice genotypes were confirmed by PCR product gel migration. Table represents expected band sizes.

**A**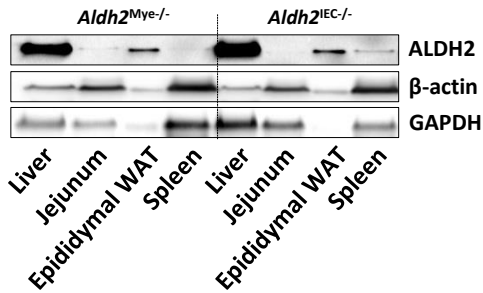**B**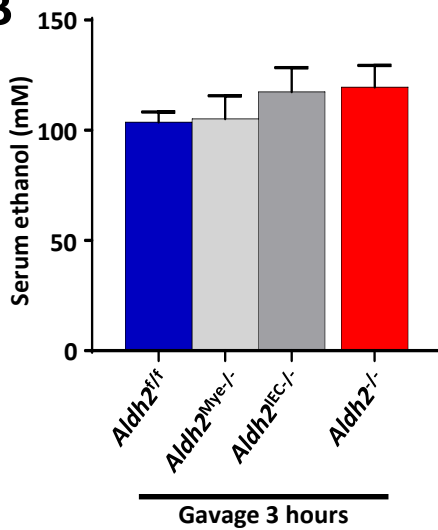**C**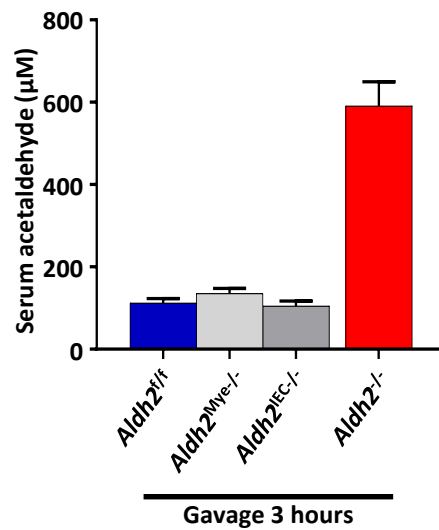

### Figure S2: Intestinal epithelial cell- and myeloid-cell *Aldh2*-deficiency does not impact acetaldehyde clearance

Myeloid cell and intestinal epithelial cell- *Aldh2*-deficient mice were generated as described in Figure S1. (A) Tissue specific *Aldh2*-deficiency was verified by Western blot. (B) Serum ethanol and (C) acetaldehyde levels were measured after a 5 g/kg ethanol gavage, as described in Figure 2. Data is represented as mean  $\pm$  S.E.M. (n=9-14 mice per group).

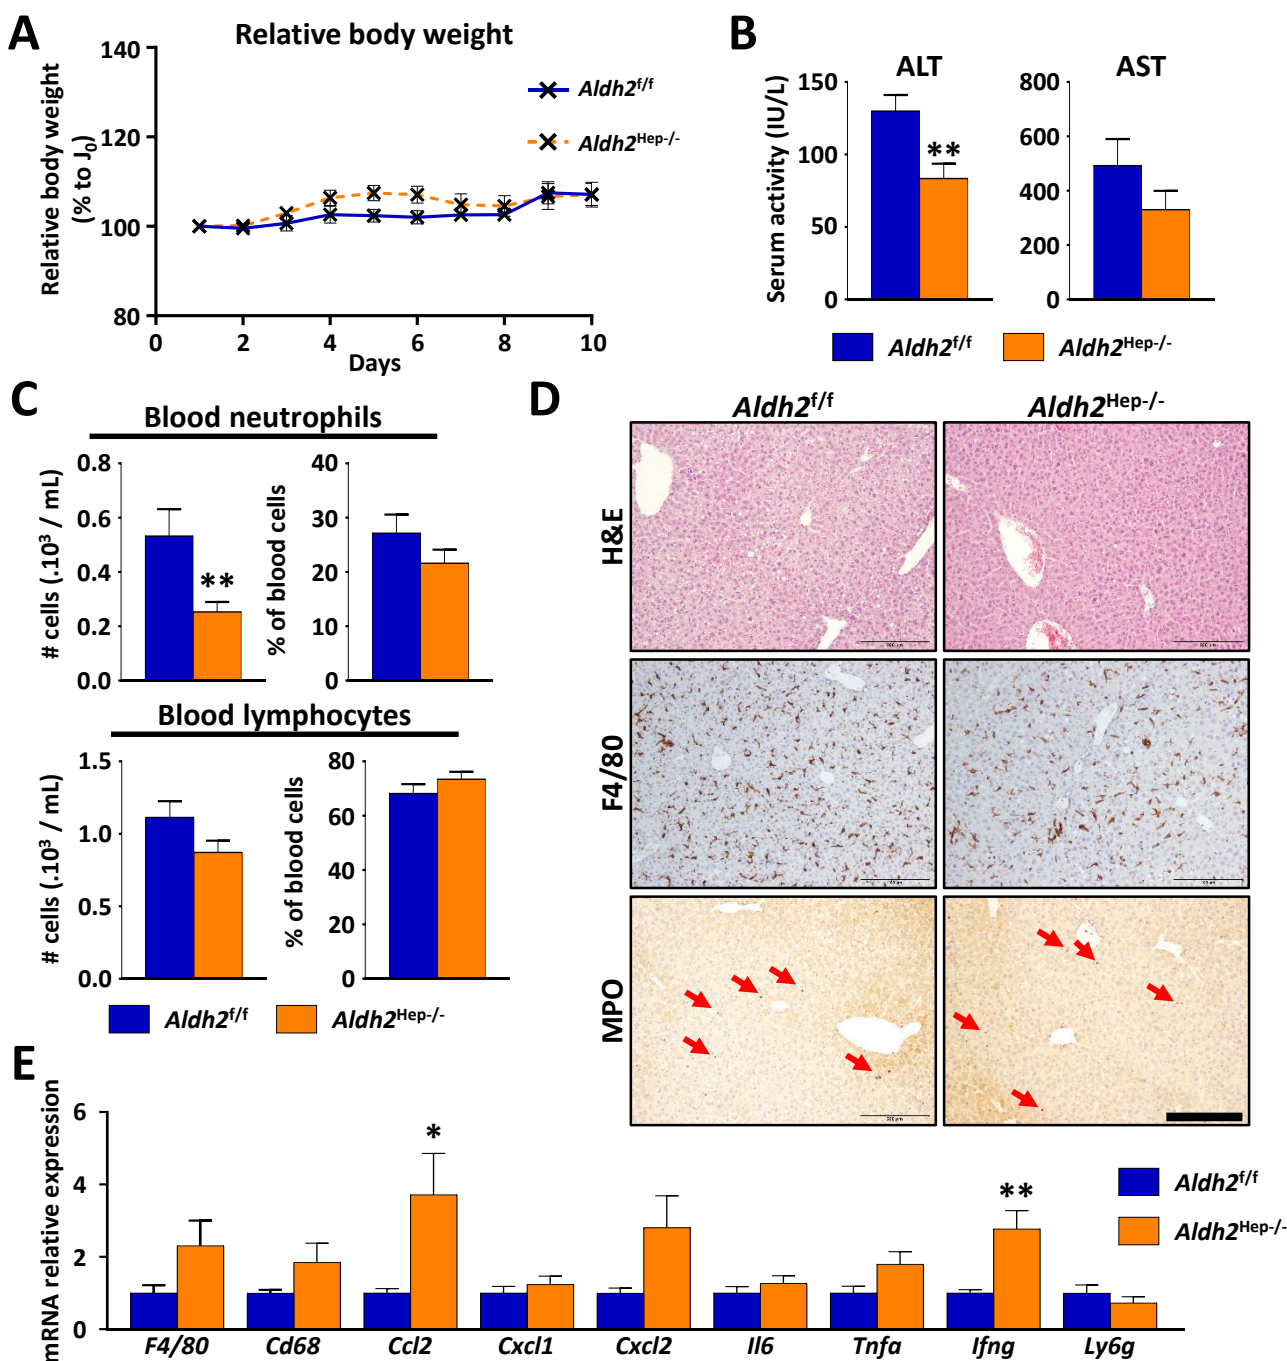

**Figure S3: Liver ALDH2-deficiency leads to reduced circulating immune cell numbers and liver injury, but increased liver inflammation in the chronic plus ethanol binge model**

*Aldh2<sup>fl/fl</sup>* and *Aldh2<sup>Hep-/-</sup>* mice were fed with an ethanol diet for 10 days, then received a single ethanol gavage and were killed 9 hours later. (A) Body weights were recorded from the start of the ethanol feeding (Day 0). (B) Serum alanine amino transferase (ALT) and aspartate amino transferase (AST) were measured. (C) The number and percentage of circulating blood neutrophils and lymphocytes were measured by a haematology counter. (D) Liver sections were performed and stained with hematein-eosin (H&E), anti-F4/80 or anti-myeloperoxidase (MPO) antibodies. Red arrows indicate MPO<sup>+</sup> neutrophils. Scale bar: 200  $\mu$ m. (E) Quantitative RT-PCR was performed on liver homogenates in the chronic plus binge model. Data is represented as mean  $\pm$  S.E.M. (n=12-14 mice per group), unpaired Student's t test (B, C, E).



**A**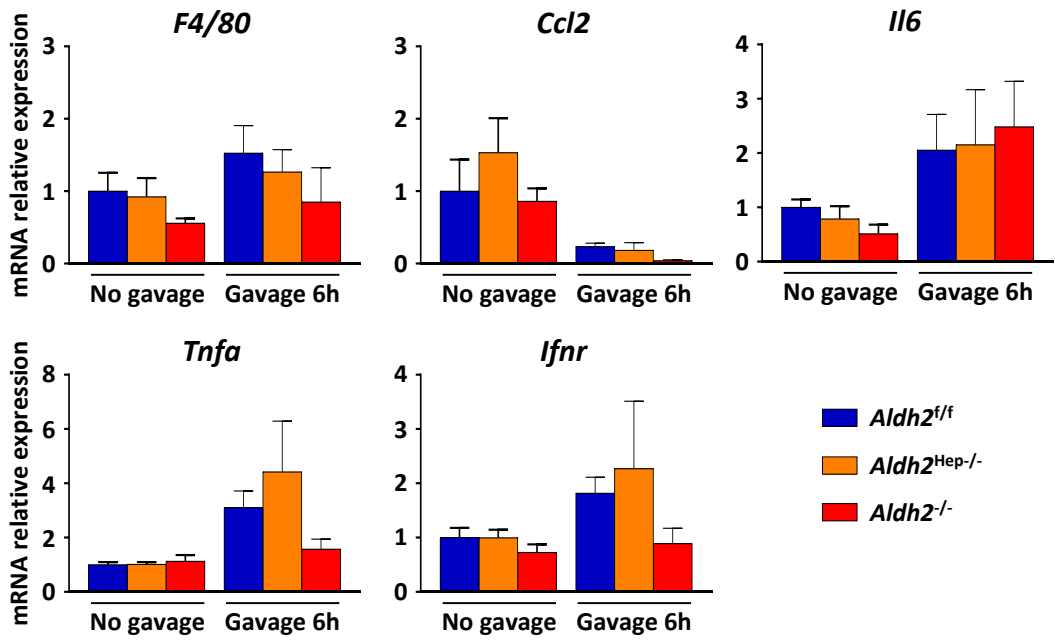**B**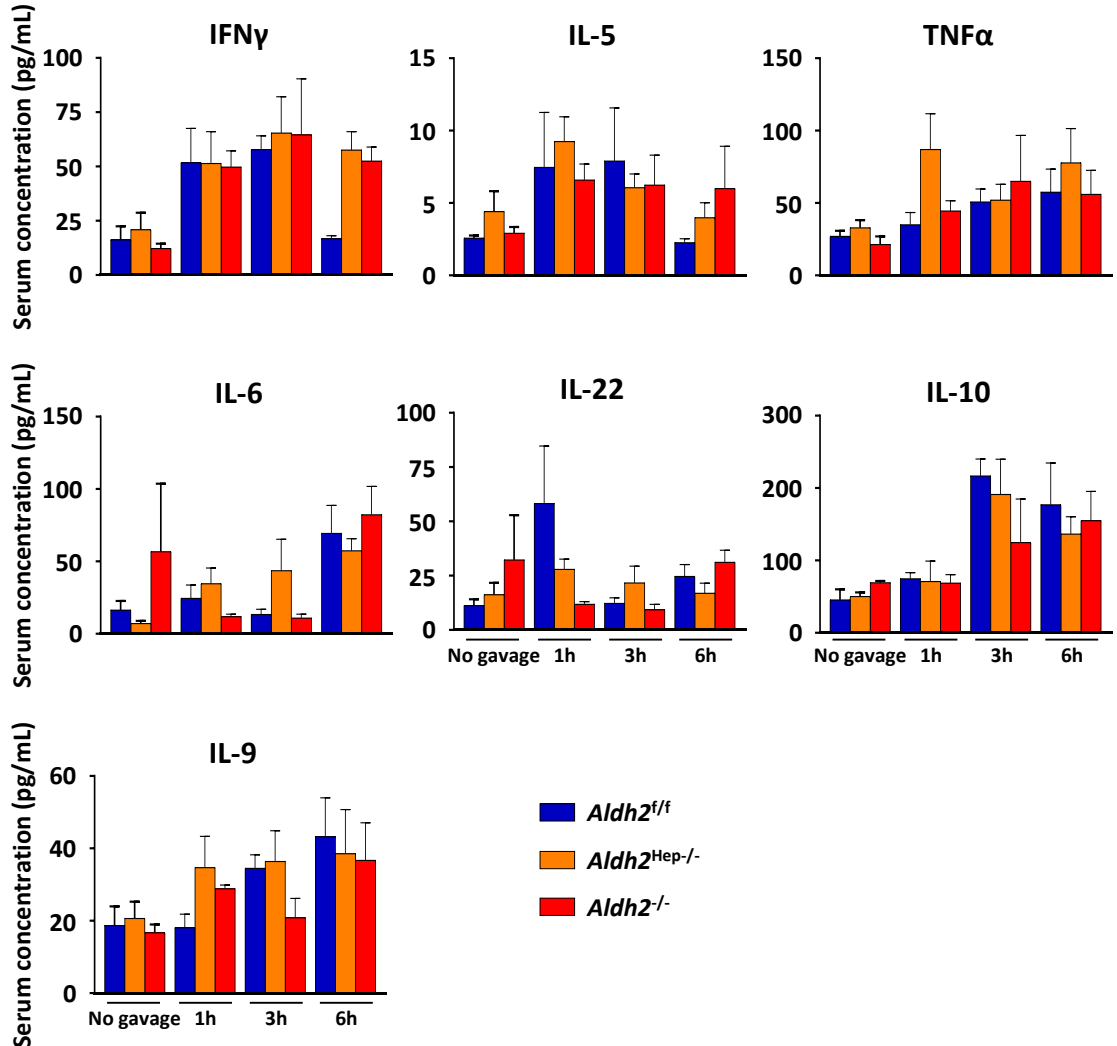

**Figure S4: Liver ALDH2-deficiency does not affect hepatic or systemic inflammation after ethanol gavage**

*Aldh2*<sup>f/f</sup>, *Aldh2*<sup>Hep<sup>-/-</sup></sup> and *Aldh2*<sup>-/-</sup> mice received a single ethanol gavage (5 g/kg) and were killed at the indicated times. (A) Quantitative RT-PCR was performed on liver homogenates. (B) Serum cytokine levels were measured by Cytometric bead array . Data is represented as mean ± S.E.M. (n=3-5 mice per group), 1-way ANOVA followed by multiple comparison test was performed (no relevant statistical differences were observed between the experimental groups).

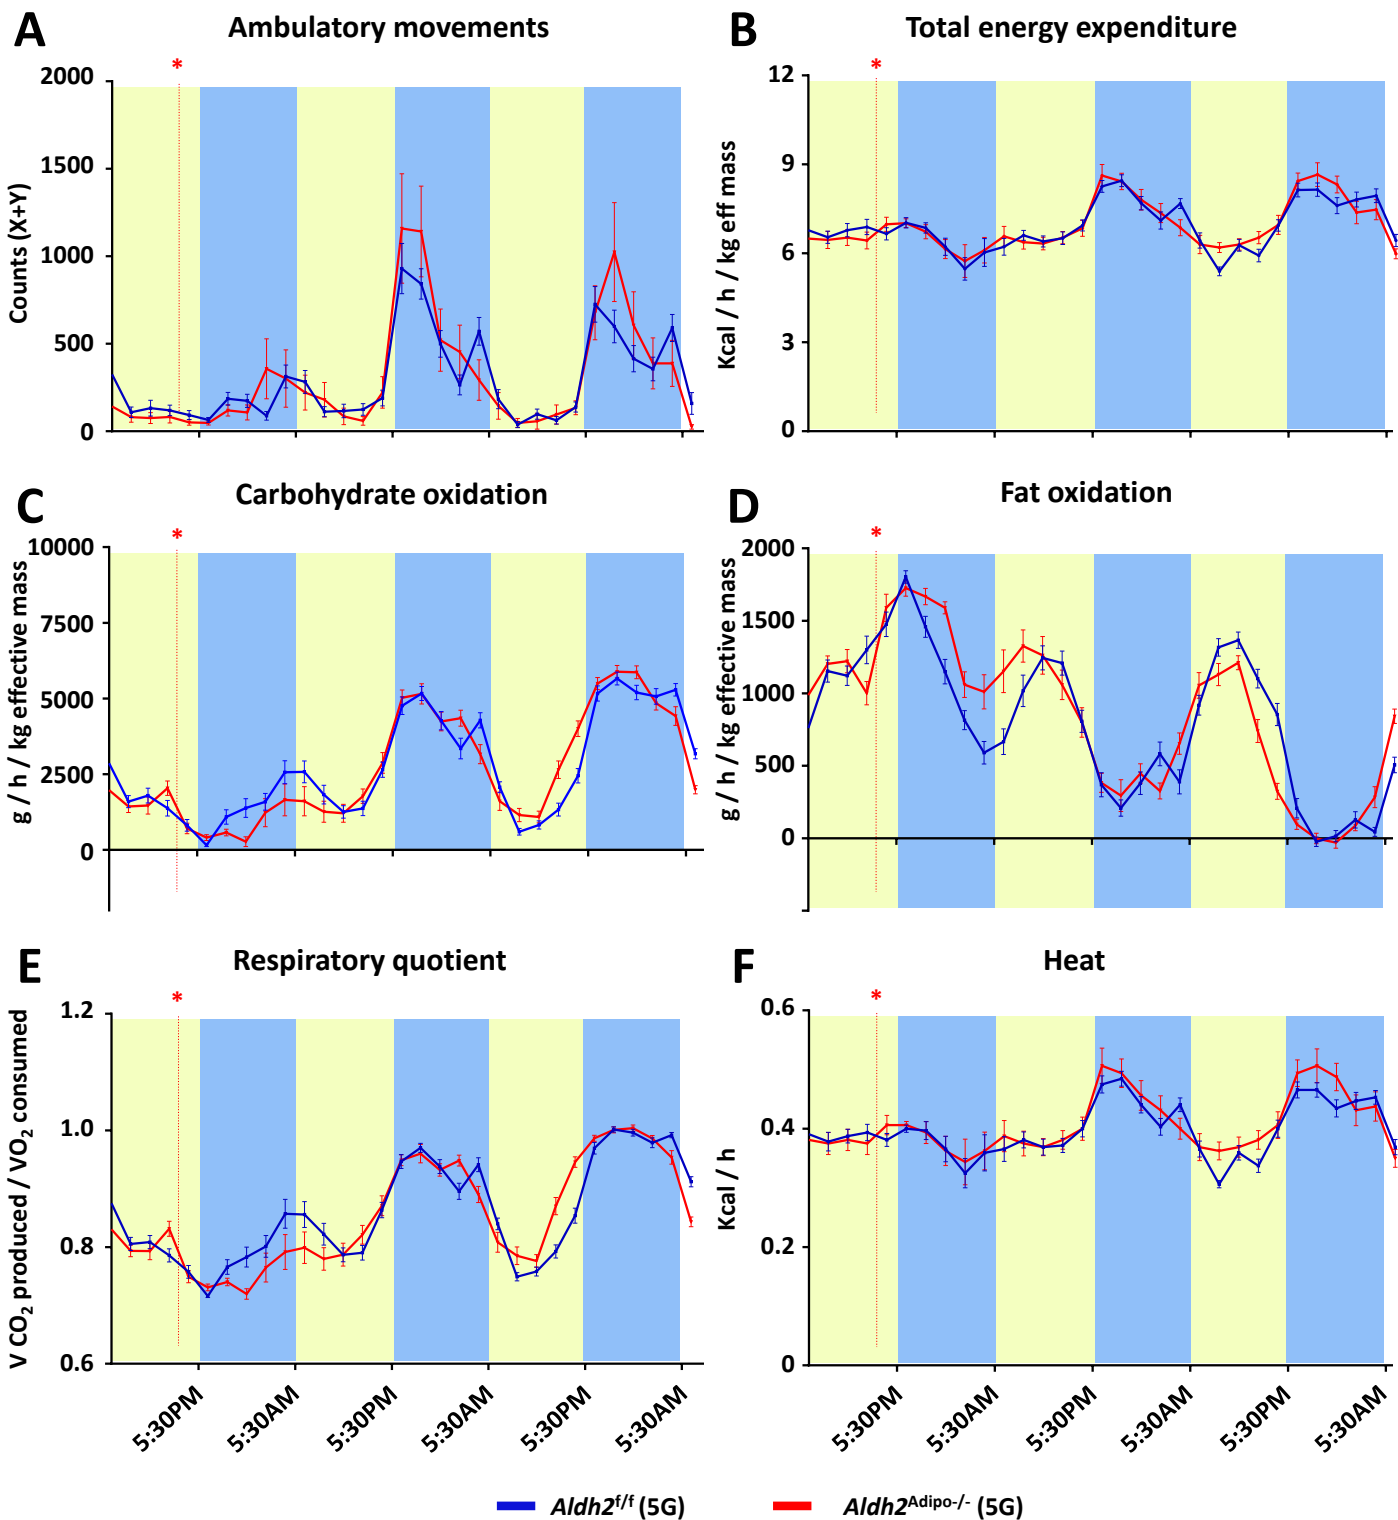

**Figure S5: Adipose-tissue specific *Aldh2* deficiency does not affect metabolic rates after acute ethanol gavage**

(A-F) Metabolic parameters were measured in control, or adipose tissue *Aldh2* deficient mice (*Aldh2<sup>Adipo</sup>-/-*) after a single 5 g/kg ethanol gavage. The red line indicates the time at which the gavage was given to the mice. Yellow and blue bars represent 12-hour day- and night-time, respectively. Data is represented as mean  $\pm$  S.E.M. (n=4 mice per group).

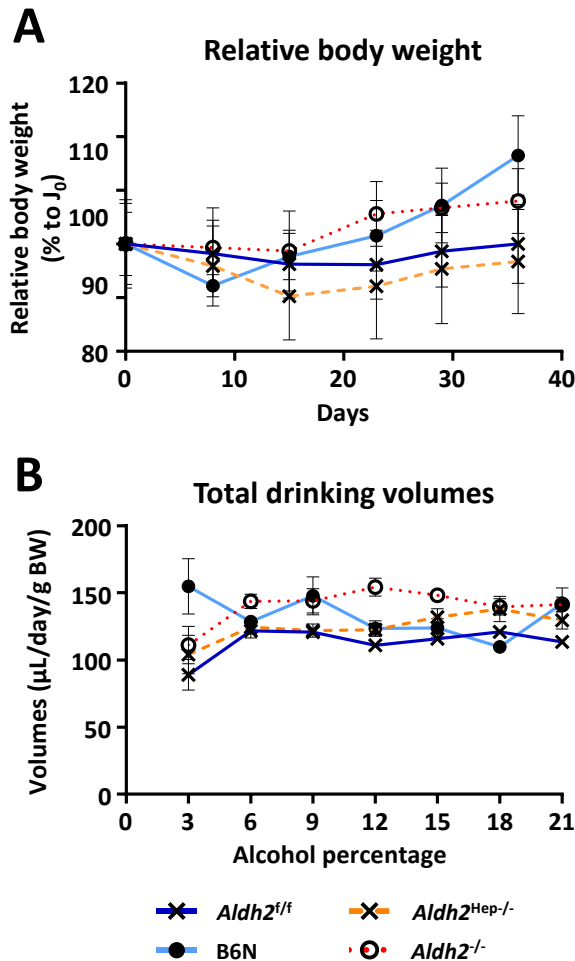

**Figure S6: Body weight remains constant during two-bottle choice experiment, and all groups had similar total drinking volumes**

(A) Mouse body weight was measured and remained unchanged during the two-bottle experiment in all groups. (B) Mice of all genotypes drank similar cumulated volumes of water and ethanol all along the protocol. Data is represented as mean  $\pm$  S.E.M. (n=5-7 mice per group).

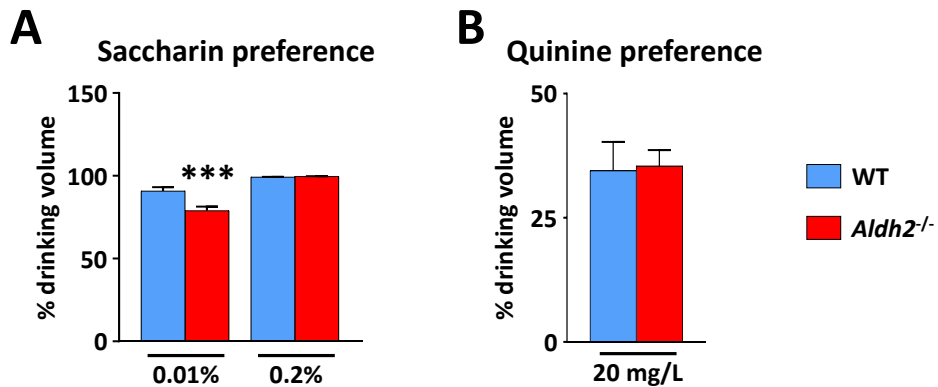

**Figure S7: Global *Aldh2*-deficiency does not affect sweet and bitter taste preference**

WT and *Aldh2*<sup>-/-</sup> mice were subjected to a two-bottle paradigm in which they were offered a bottle of regular drinking water, and a bottle containing either (A) 0.01% or 0.2% saccharin, or (B) 20 mg/L quinine. Drinking preference of the test bottle is indicated as the percentage of daily total liquid intake from the bottle containing saccharin or quinine. Data is represented as mean  $\pm$  S.E.M. (n=6-7 mice per group), \*\*\*p<0,005, unpaired Student's t test.

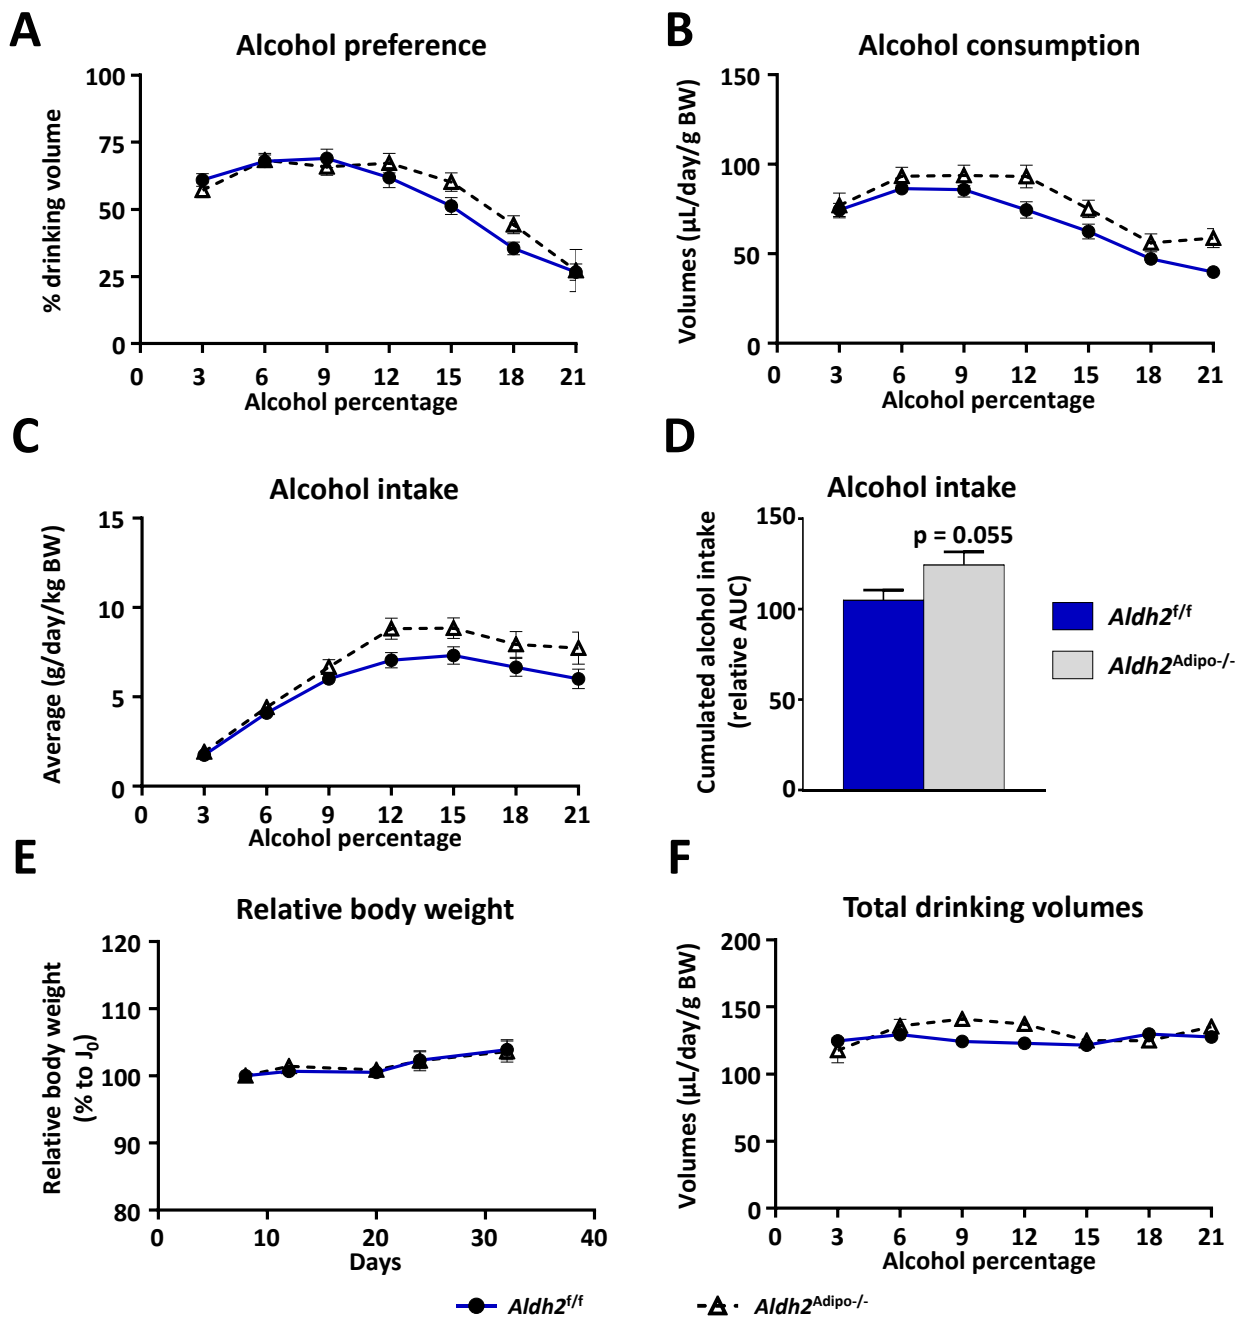

**Figure S8: Adipose tissue ALDH2-deficient mice tend to have a higher alcohol preference than control animals**

Concomitantly with mice presented in Figure 4, *Aldh2<sup>Adipo-/-</sup>* mice were subjected to the two-bottle paradigm. (A) Alcohol preference, (B) consumption, and (C) intake were measured. (D) Cumulated area under curve representing total alcohol intake during the experiment. (E) Relative body weight and (F) total drinking volumes were recorded. Data is represented as mean ± S.E.M. (n=7 mice per group), unpaired Student's t test.

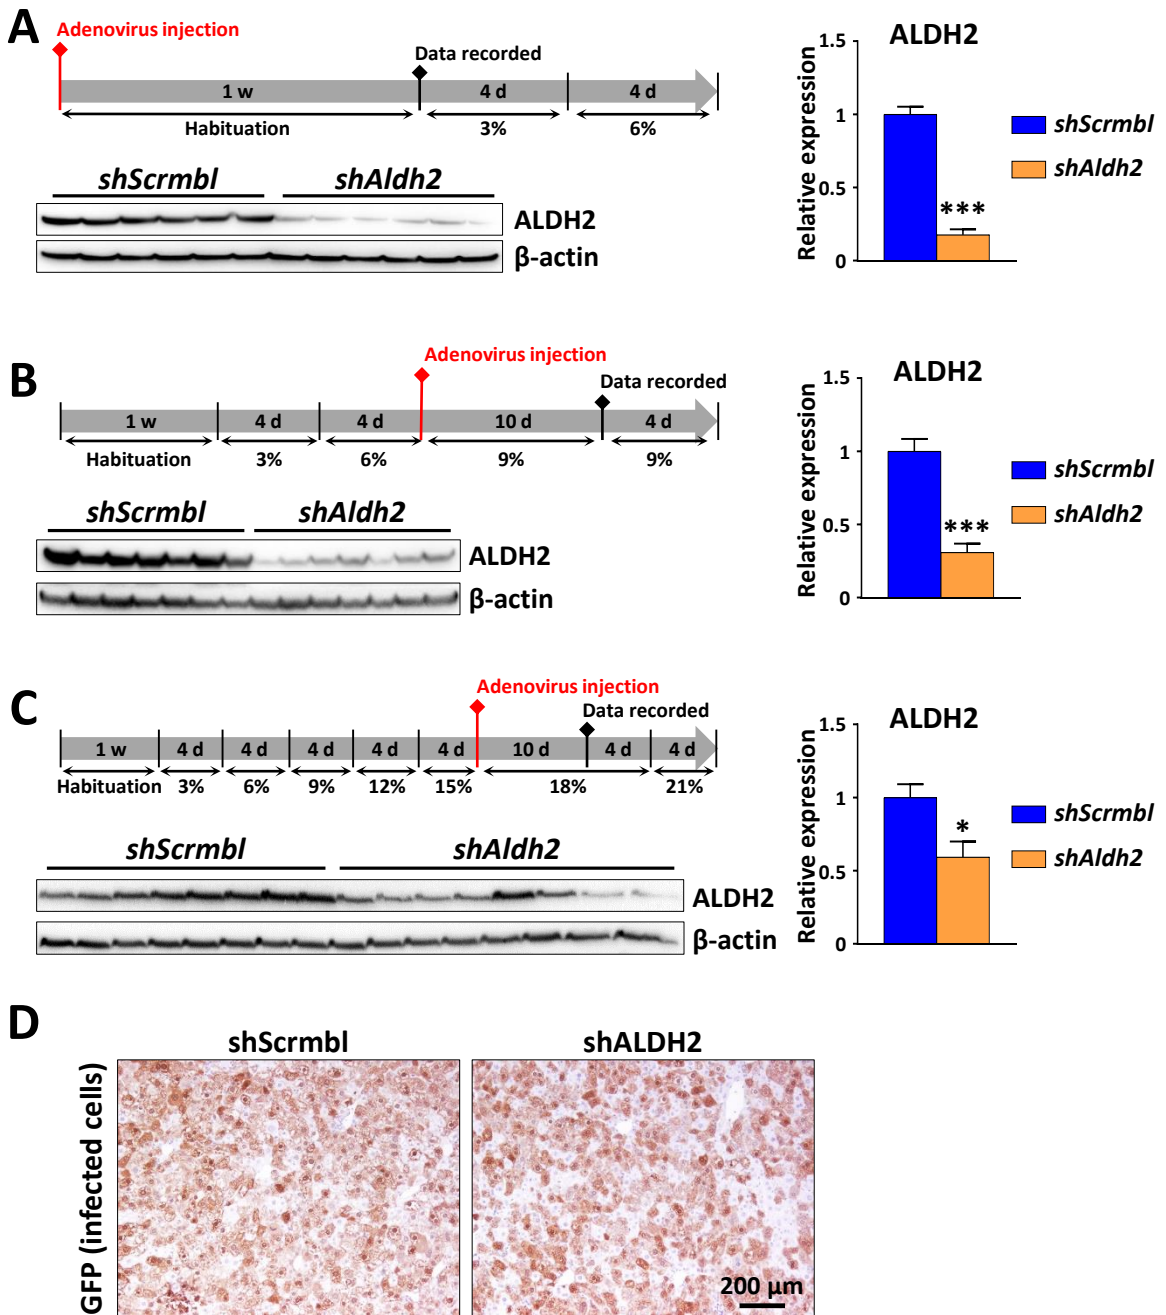

**Figure S9: Successful hepatocyte infection and *Aldh2* silencing by using *shAldh2* adenovirus**

Mice were injected with scramble or *shAldh2* adenovirus as indicated in Figure 6. (A-C) At the end of each set of measurements, mice were killed and liver ALDH2 expression was assessed by Western blot. Panels A, B, and C correspond to the data presented in Figure 6 panels A, B, and C, respectively. (D) Hepatocyte infection was verified by GFP immunostaining (brown) on liver sections.
